# Supplementary material for: Limited alignment of publicly competitive disease funding with disease burden in Japan
Source: PLOS journal article supplement (doi:10.1371/journal.pone.0228542), 2020-02-10
Supplement: S9 (10.1371/journal.pone.0228542.s009) [file journal.pone.0228542.s009]

S6 Table: The proportion of the estimated total health R&D funding (2015–2016) by the 22 GBD disease categories, compared to those of Japan's and global DALYs in 2016.

| GBD disease groups at level 1                                               | GBD disease groups at level 2                   | % of total funding | Japan            |         | Global           |         |
|-----------------------------------------------------------------------------|-------------------------------------------------|--------------------|------------------|---------|------------------|---------|
|                                                                             |                                                 |                    | % of total DALYs | p-value | % of total DALYs | p-value |
| Communicable, maternal and neonatal conditions and nutritional deficiencies | 1. HIV/AIDS and sexually transmitted infections | 0.2                | 0.1              | 1.00    | 2.8              | <0.001  |
|                                                                             | 2. Respiratory infections and tuberculosis      | 4.0                | 3.5              | 1.00    | 6.6              | 0.08    |
|                                                                             | 3. Enteric infections                           | 0.6                | 0.2              | 1.00    | 3.8              | <0.001  |
|                                                                             | 4. Neglected tropical diseases and malaria      | 1.7                | 0.0              | <0.01   | 2.5              | 1.00    |
|                                                                             | 5. Other infectious diseases                    | 3.5                | 0.3              | <0.001  | 2.4              | 0.93    |
|                                                                             | 6. Maternal and neonatal disorders              | 0.5                | 1.4              | 0.46    | 8.1              | <0.001  |
|                                                                             | 7. Nutritional deficiencies                     | 0.0                | 0.8              | 0.15    | 2.4              | <0.001  |
| Non-communicable diseases                                                   | 8. Neoplasms                                    | 28.5               | 19.2             | <0.001  | 9.2              | <0.001  |
|                                                                             | 9. Cardiovascular diseases                      | 8.0                | 14.8             | <0.001  | 14.5             | <0.001  |
|                                                                             | 10. Chronic respiratory diseases                | 1.5                | 3.9              | 0.02    | 4.4              | <0.01   |
|                                                                             | 11. Digestive diseases                          | 7.7                | 3.1              | <0.001  | 3.4              | <0.001  |
|                                                                             | 12. Neurological disorders                      | 12.1               | 8.9              | 0.24    | 4.4              | <0.001  |
|                                                                             | 13. Mental disorders                            | 5.1                | 6.1              | 1.00    | 4.8              | 1.00    |
|                                                                             | 14. Substance use disorders                     | 0.2                | 0.9              | 0.46    | 1.7              | <0.05   |
|                                                                             | 15. Diabetes and kidney diseases                | 2.0                | 4.1              | 0.11    | 4.1              | 0.07    |
|                                                                             | 16. Skin and subcutaneous diseases              | 1.9                | 2.2              | 1.00    | 1.7              | 1.00    |
|                                                                             | 17. Sense organ diseases                        | 2.8                | 4.5              | 0.45    | 2.6              | 1.00    |
|                                                                             | 18. Musculoskeletal disorders                   | 1.0                | 11.9             | <0.001  | 5.4              | <0.001  |
|                                                                             | 19. Other non-communicable diseases             | 10.1               | 3.7              | <0.001  | 4.9              | <0.001  |
| Injuries                                                                    | 20. Transport injuries                          | 0.0                | 1.6              | <0.05   | 3.0              | <0.001  |
|                                                                             | 21. Unintentional injuries*                     | 8.5                | 6.1              | 0.43    | 4.3              | <0.01   |
|                                                                             | 22. Self-harm and interpersonal violence        | 0.1                | 3.0              | <0.001  | 2.9              | <0.001  |

\* Unintentional injuries do not include transport injuries. Other infectious diseases include meningitis, encephalitis, diphtheria, whooping cough, tetanus, measles, varicella and herpes zoster, acute hepatitis, and other unspecified infectious diseases; other non-infectious diseases include congenital birth defects, urinary diseases and male infertility, gynecological diseases, hemoglobinopathies and hemolytic anemias, endocrine, metabolic, blood, and immune disorders, oral disorders, and sudden infant death syndrome.
